# Supplementary material for: Development of an electrically responsive hydrogel for programmable in situ immobilization within a microfluidic device
Source: Royal Society of Chemistry journal article supplement (doi:10.1039/d1sm00510c), 2021-01-01
Supplement: d1sm00510c7.pdf [file d1sm00510c7.pdf]

## Electronic Supporting Information

### **Development of an electrically responsive hydrogel for programmable *in situ* immobilization within a microfluidic device**

*Rok Ambrožič*<sup>a</sup>, and *Igor Plazl*<sup>a,b\*</sup>

<sup>a</sup>University of Ljubljana, Faculty of Chemistry and Chemical Technology, Večna pot 113, 1000 Ljubljana, Slovenia

<sup>b</sup> Chair of Microprocess Engineering and Technology - COMPETE, University of Ljubljana, Večna pot 113, 1000 Ljubljana, Slovenia

\*Corresponding author: Igor Plazl

E-mail: [igor.plazl@fkkt.uni-lj.si](mailto:igor.plazl@fkkt.uni-lj.si)

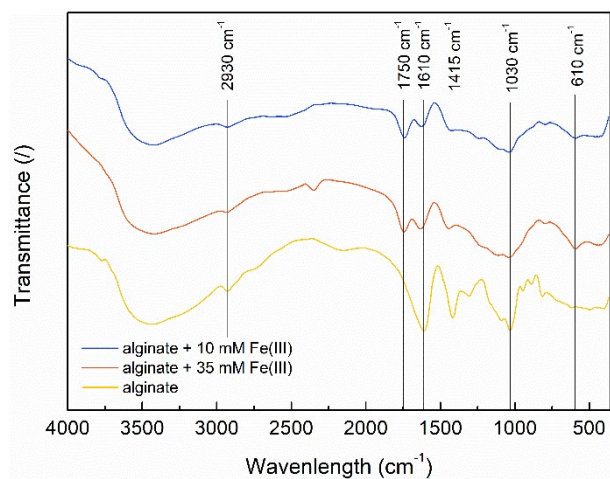

**Fig. S1** FT-IR spectra of neat alginate, and Fe(III)-alginate hydrogels at different iron ion concentrations (10 mM and 35 mM).

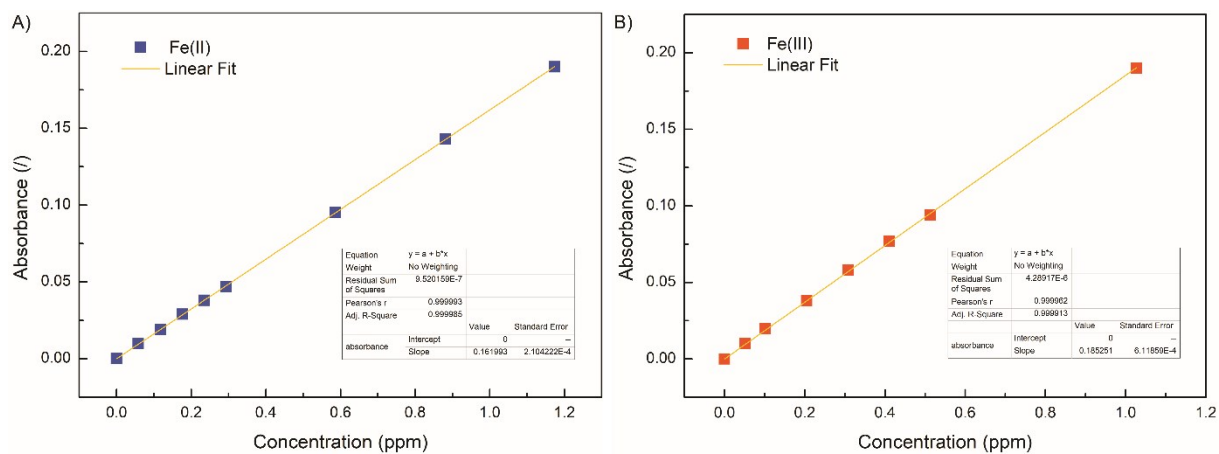

**Fig. S2** Calibration curve for Fe(II) (A) and Fe(III) (B) determined by spectrophotometric measurements at 510 nm wavelength.

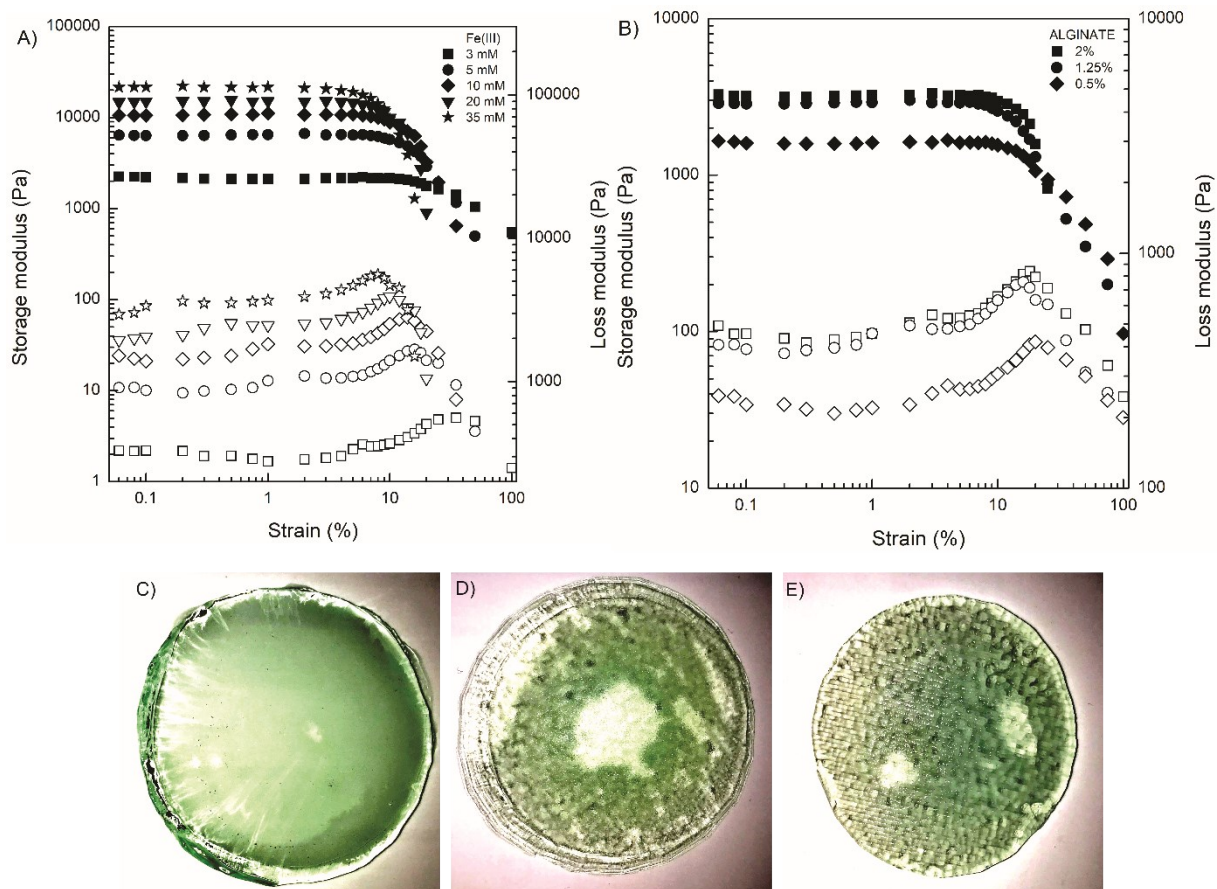

**Fig. S3** The amplitude sweep test for of crosslinked Fe(III)-alginate hydrogels at different concentrations of Fe(III) ions (A) and Na-alginate (B). Images of crosslinked Fe(III)-alginate hydrogels for rheological study with various Fe(III) concentrations: 10 mM (C), 20 mM (D), and 35 mM (E).

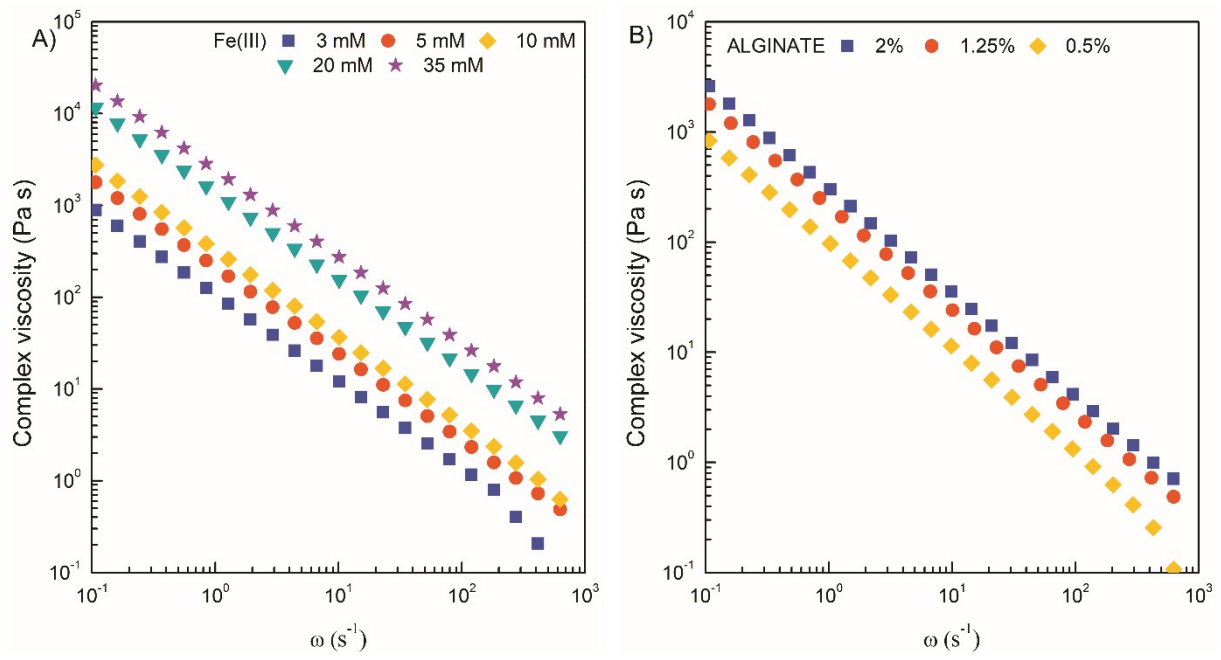

**Fig. S4** Complex viscosity of crosslinked Fe(III)-alginate hydrogels at different concentrations of Fe(III) ions (A) and Na-alginate (B).

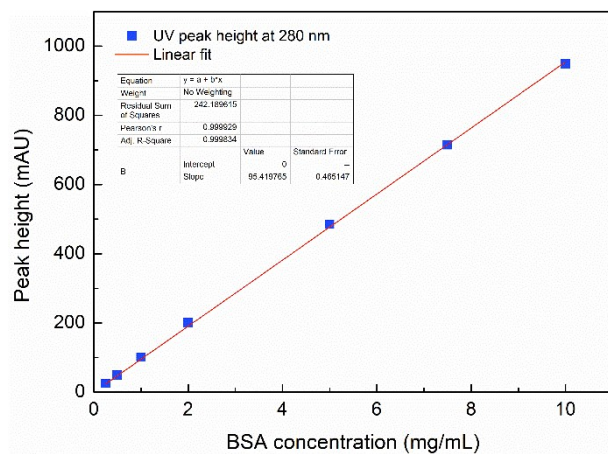

**Fig. S5** Calibration curve for BSA determined by the height of the UV absorption peak at 280 nm wavelength.
