# Supplementary figures and images for: Development of an electrically responsive hydrogel for programmable in situ immobilization within a microfluidic device
Source: Royal Society of Chemistry journal article supplement (doi:10.1039/d1sm00510c), 2021-01-01

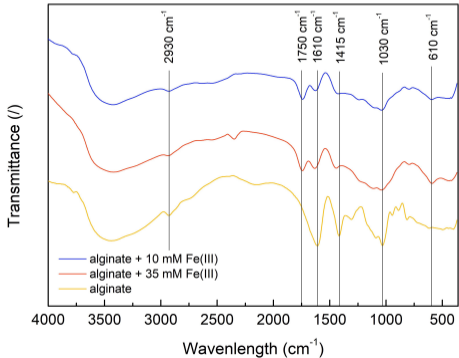

Supplement: d1sm00510c2.pdf [file d1sm00510c2.pdf]

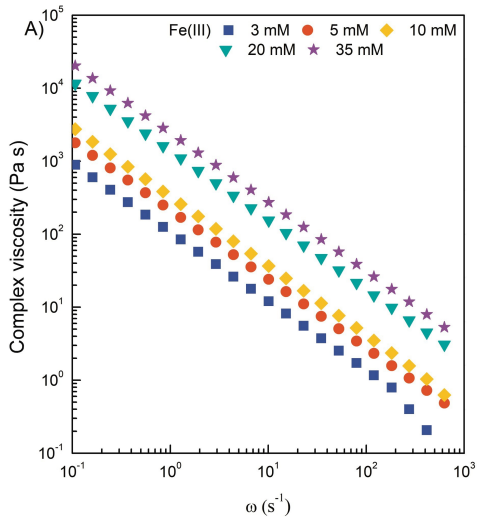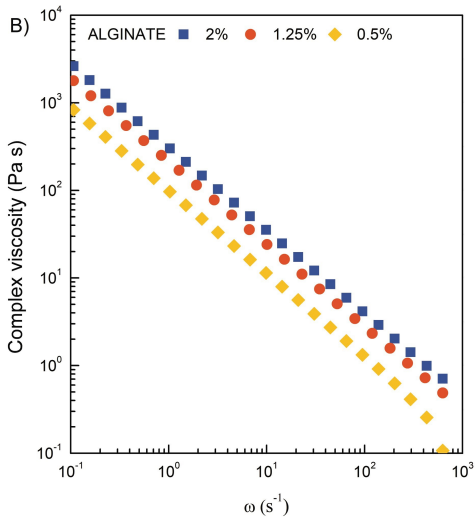

Supplement: d1sm00510c5.pdf [file d1sm00510c5.pdf]
